# Supplementary material for: Dynamic Arterial Elastance to Predict Mean Arterial Pressure Decrease after Reduction of Vasopressor in Septic Shock Patients
Source: MDPI journal article supplement (doi:10.3390/life13010028), 2022-12-22

**Table S1.** The multivariate analysis considering systemic vascular resistances indexed (SVRIpre), cariac index (CIpre), arterial elastance (Eapre), dynamic elastance (PPVSVVpre) all before drug reduction.

| Outcome   | Odds ratio | Std. err. | z     | P> z  | [95% conf. interval] |          |
|-----------|------------|-----------|-------|-------|----------------------|----------|
| SVRIpre   | .9987234   | .0012728  | -1.00 | 0.316 | .9962318             | 1.001221 |
| CIpre     | .0084215   | .0180381  | -2.23 | 0.026 | .0001265             | .5605168 |
| Eapre     | .1792535   | .2990451  | -1.03 | 0.303 | .0068144             | 4.715312 |
| PPVSVVpre | .0008729   | .0020176  | -3.05 | 0.002 | 9.41e-06             | .0810019 |
| _cons     | 2.84e+09   | 2.72e+10  | 2.27  | 0.023 | 19.98376             | 4.05e+17 |

**Figure S1.** The internal validation of the nomogram model performed at 1000 repetitions boot.

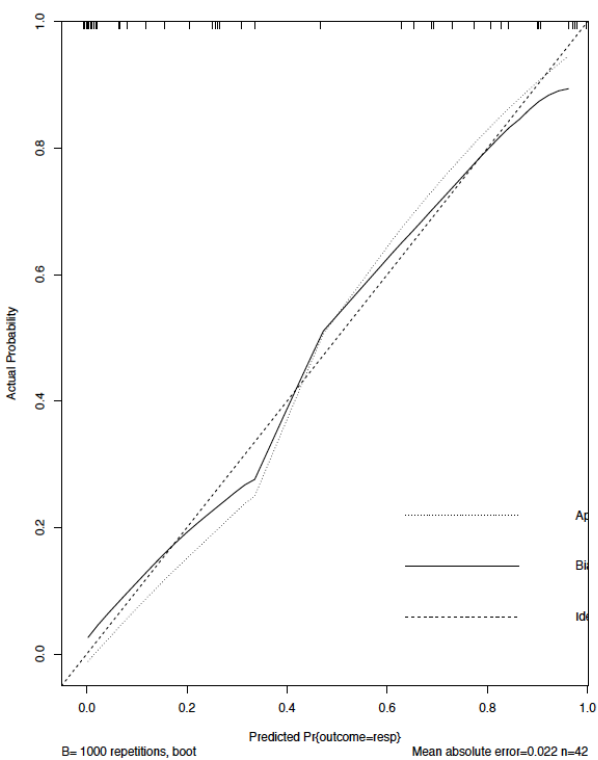

Supplement: s1 [file s1]
